# Supplementary material for: Global systematic review of cost of illness and economic evaluation studies associated with snakebite
Source: PubMed Central journal article supplement (PMC7719278; doi:10.7189/jogh.10.020415), 2020-12
Supplement: jogh-10-020415-s001.pdf [file jogh-10-020415-s001.pdf]

## SUPPLEMENTARY MATERIAL

### GLOBAL SYSTEMATIC REVIEW OF COST OF ILLNESS AND ECONOMIC EVALUATION STUDIES ASSOCIATED WITH SNAKEBITE

*Appendix S1 PRISMA checklist.*

| Section/topic             | # | Checklist item                                                                                                                                                                                                                                                                                              | Reported on page #      |
|---------------------------|---|-------------------------------------------------------------------------------------------------------------------------------------------------------------------------------------------------------------------------------------------------------------------------------------------------------------|-------------------------|
| <b>TITLE</b>              |   |                                                                                                                                                                                                                                                                                                             |                         |
| Title                     | 1 | Identify the report as a systematic review, meta-analysis, or both.                                                                                                                                                                                                                                         | 1                       |
| <b>ABSTRACT</b>           |   |                                                                                                                                                                                                                                                                                                             |                         |
| Structured summary        | 2 | Provide a structured summary including, as applicable: background; objectives; data sources; study eligibility criteria, participants, and interventions; study appraisal and synthesis methods; results; limitations; conclusions and implications of key findings; systematic review registration number. | 1-2                     |
| <b>INTRODUCTION</b>       |   |                                                                                                                                                                                                                                                                                                             |                         |
| Rationale                 | 3 | Describe the rationale for the review in the context of what is already known.                                                                                                                                                                                                                              | 3                       |
| Objectives                | 4 | Provide an explicit statement of questions being addressed with reference to participants, interventions, comparisons, outcomes, and study design (PICOS).                                                                                                                                                  | 3                       |
| <b>METHODS</b>            |   |                                                                                                                                                                                                                                                                                                             |                         |
| Protocol and registration | 5 | Indicate if a review protocol exists, if and where it can be accessed (e.g., Web address), and, if available, provide registration information including registration number.                                                                                                                               | 3                       |
| Eligibility criteria      | 6 | Specify study characteristics (e.g., PICOS, length of follow-up) and report characteristics (e.g., years considered, language, publication status) used as criteria for eligibility, giving rationale.                                                                                                      | 3                       |
| Information sources       | 7 | Describe all information sources (e.g., databases with dates of coverage, contact with study authors to identify additional studies) in the search and date last searched.                                                                                                                                  | 3                       |
| Search                    | 8 | Present full electronic search strategy for at least one database, including any limits used, such that it could be repeated.                                                                                                                                                                               | <b>3-4, Appendix S2</b> |

| Section/topic                      | #  | Checklist item                                                                                                                                                                                                         | Reported on page #           |
|------------------------------------|----|------------------------------------------------------------------------------------------------------------------------------------------------------------------------------------------------------------------------|------------------------------|
| Study selection                    | 9  | State the process for selecting studies (i.e., screening, eligibility, included in systematic review, and, if applicable, included in the meta-analysis).                                                              | 3-4                          |
| Data collection process            | 10 | Describe method of data extraction from reports (e.g., piloted forms, independently, in duplicate) and any processes for obtaining and confirming data from investigators.                                             | 3-4                          |
| Data items                         | 11 | List and define all variables for which data were sought (e.g., PICOS, funding sources) and any assumptions and simplifications made.                                                                                  | 3-4                          |
| Risk of bias in individual studies | 12 | Describe methods used for assessing risk of bias of individual studies (including specification of whether this was done at the study or outcome level), and how this information is to be used in any data synthesis. | 4                            |
| Summary measures                   | 13 | State the principal summary measures (e.g., risk ratio, difference in means).                                                                                                                                          | N/A                          |
| Synthesis of results               | 14 | Describe the methods of handling data and combining results of studies, if done, including measures of consistency (e.g., I <sup>2</sup> ) for each meta-analysis.                                                     | N/A                          |
| Risk of bias across studies        | 15 | Specify any assessment of risk of bias that may affect the cumulative evidence (e.g., publication bias, selective reporting within studies).                                                                           | -                            |
| Additional analyses                | 16 | Describe methods of additional analyses (e.g., sensitivity or subgroup analyses, meta-regression), if done, indicating which were pre-specified.                                                                       | N/A                          |
| <b>RESULTS</b>                     |    |                                                                                                                                                                                                                        |                              |
| Study selection                    | 17 | Give numbers of studies screened, assessed for eligibility, and included in the review, with reasons for exclusions at each stage, ideally with a flow diagram.                                                        | 4, Figure 1                  |
| Study characteristics              | 18 | For each study, present characteristics for which data were extracted (e.g., study size, PICOS, follow-up period) and provide the citations.                                                                           | 4-5, Table 1, Appendix S3-S4 |
| Risk of bias within studies        | 19 | Present data on risk of bias of each study and, if available, any outcome level assessment (see item 12).                                                                                                              | Appendix S6-S7               |
| Results of individual studies      | 20 | For all outcomes considered (benefits or harms), present, for each study: (a) simple summary data for each intervention group (b) effect estimates and confidence intervals, ideally with a forest plot.               | Appendix S5                  |
| Synthesis of results               | 21 | Present results of each meta-analysis done, including confidence intervals and measures of consistency.                                                                                                                | N/A                          |

| Section/topic               | #  | Checklist item                                                                                                                                                                       | Reported on page # |
|-----------------------------|----|--------------------------------------------------------------------------------------------------------------------------------------------------------------------------------------|--------------------|
| Risk of bias across studies | 22 | Present results of any assessment of risk of bias across studies (see Item 15).                                                                                                      | -                  |
| Additional analysis         | 23 | Give results of additional analyses, if done (e.g., sensitivity or subgroup analyses, meta-regression [see Item 16]).                                                                | <b>N/A</b>         |
| <b>DISCUSSION</b>           |    |                                                                                                                                                                                      |                    |
| Summary of evidence         | 24 | Summarize the main findings including the strength of evidence for each main outcome; consider their relevance to key groups (e.g., healthcare providers, users, and policy makers). | <b>7-8</b>         |
| Limitations                 | 25 | Discuss limitations at study and outcome level (e.g., risk of bias), and at review-level (e.g., incomplete retrieval of identified research, reporting bias).                        | <b>8</b>           |
| Conclusions                 | 26 | Provide a general interpretation of the results in the context of other evidence, and implications for future research.                                                              | <b>8</b>           |
| <b>FUNDING</b>              |    |                                                                                                                                                                                      |                    |
| Funding                     | 27 | Describe sources of funding for the systematic review and other support (e.g., supply of data); role of funders for the systematic review.                                           | <b>8</b>           |

From: Moher D, Liberati A, Tetzlaff J, Altman DG, The PRISMA Group (2009). Preferred Reporting Items for Systematic Reviews and Meta-Analyses: The PRISMA Statement. PLoS Med 6(7): e1000097. doi:10.1371/journal.pmed1000097

**Appendix S2 Full search strategies.**

**Searches were conducted for articles published up to 31 July 2019.**

**1. PubMed**

| <b>Search number</b> | <b>Search terms</b>                                                               | <b>Results</b> |
|----------------------|-----------------------------------------------------------------------------------|----------------|
| #1                   | snake*                                                                            | 25363          |
| #2                   | burden OR economic* OR cost* OR "cost of illness" OR resource OR expenditure      | 1481775        |
| #3                   | "economic evaluation" OR "cost-effectiveness" OR "cost-utility" OR "cost-benefit" | 113425         |
| #4                   | #2 OR #3                                                                          | 1481775        |
| #5                   | #1 AND #4                                                                         | 1317           |

**2. EMBASE (via Elsevier)**

| <b>Search number</b> | <b>Search terms</b>                                                               | <b>Results</b> |
|----------------------|-----------------------------------------------------------------------------------|----------------|
| #1                   | snake*                                                                            | 23162          |
| #2                   | burden OR economic* OR cost* OR "cost of illness" OR resource OR expenditure      | 1527675        |
| #3                   | "economic evaluation" OR "cost-effectiveness" OR "cost-utility" OR "cost-benefit" | 214963         |
| #4                   | #2 OR #3                                                                          | 1527675        |
| #5                   | #1 AND #4                                                                         | 1783           |

### 3. Cochrane library

| Search number | Search terms                                                                      | Results |
|---------------|-----------------------------------------------------------------------------------|---------|
| #1            | snake*                                                                            | 458     |
| #2            | burden OR economic* OR cost* OR "cost of illness" OR resource OR expenditure      | 108006  |
| #3            | "economic evaluation" OR "cost-effectiveness" OR "cost-utility" OR "cost-benefit" | 26054   |
| #4            | #2 OR #3                                                                          | 108006  |
| #5            | #1 AND #4                                                                         | 48      |

### 4. EconLit (via EBSCO)

| Search number | Search terms                                                                      | Results |
|---------------|-----------------------------------------------------------------------------------|---------|
| #1            | snake*                                                                            | 107     |
| #2            | burden OR economic* OR cost* OR "cost of illness" OR resource OR expenditure      | 1259448 |
| #3            | "economic evaluation" OR "cost-effectiveness" OR "cost-utility" OR "cost-benefit" | 12663   |
| #4            | #2 OR #3                                                                          | 1259448 |
| #5            | #1 AND #4                                                                         | 89      |

### Additional searches in health economic databases

#### 1. Health Economic Evaluation Database (HEED)

HEED ceased to publish and was inaccessible since 2014.

#### 2. Tuft's Cost-effectiveness Analysis (CEA) Registry

Search found no result.

#### 3. Health Technology Assessment Database

Search found no result.

**Appendix S3 Methodological characteristics of the included cost of illness studies associated with snakebites.**

| Region/<br>Income<br>economies      | Country          | Author, year                   | Perspective   | Study<br>population                                     | Study setting                                         | Study<br>period                         | Sample<br>size            | Study<br>design | Study<br>approach | Currency<br>(Costing<br>year) | Direct cost<br>estimation<br>method | Indirect<br>cost<br>estimation<br>method | Source of<br>resource<br>utilization  | Source<br>of price             |
|-------------------------------------|------------------|--------------------------------|---------------|---------------------------------------------------------|-------------------------------------------------------|-----------------------------------------|---------------------------|-----------------|-------------------|-------------------------------|-------------------------------------|------------------------------------------|---------------------------------------|--------------------------------|
| <b>East Asia and Pacific</b>        |                  |                                |               |                                                         |                                                       |                                         |                           |                 |                   |                               |                                     |                                          |                                       |                                |
| Lower-<br>middle                    | Myanmar          | Schioldann,<br>2018 [1]        | Patient       | Snakebite<br>victims                                    | Three villages<br>in Mandalay                         | 2016                                    | 158<br>participants       | CS              | PB                | MMK,<br>USD (NR)              | Bottom-up                           |                                          | Interview                             | Interview                      |
| <b>Europe and Central Asia</b>      |                  |                                |               |                                                         |                                                       |                                         |                           |                 |                   |                               |                                     |                                          |                                       |                                |
| High                                | Spain            | Saz-<br>Parkinson,<br>2012 [2] | Health system | Envenomed<br>snakebite<br>patients                      | Nationwide                                            | 1997-<br>2009                           | 1649<br>patients          | R               | PB                | EUR (NR)                      | Bottom-up                           |                                          | Database                              | Listed<br>price                |
| <b>Latin America and Caribbean</b>  |                  |                                |               |                                                         |                                                       |                                         |                           |                 |                   |                               |                                     |                                          |                                       |                                |
| Upper-<br>middle                    | Guyana           | Bachan, 2017<br>[3]            | Societal      | Snakebite<br>patients required<br>medical<br>evacuation | Five hinder<br>land regions                           | 2011-<br>2015                           | 57 patients               | R               | PB                | USD (NR)                      | Bottom-up                           |                                          | Database                              | Listed<br>price,<br>Literature |
| Upper-<br>middle                    | Mexico           | Sotelo, 2008<br>[4]            | Provider      | Snakebite<br>children                                   | One children<br>hospital in<br>Northwestern<br>Mexico | 1977-<br>2006                           | 79 patients               | R               | PB                | MXN<br>(NR)                   | Bottom-up                           |                                          | Chart                                 | Listed<br>price                |
| <b>Middle East and North Africa</b> |                  |                                |               |                                                         |                                                       |                                         |                           |                 |                   |                               |                                     |                                          |                                       |                                |
| Upper-<br>middle                    | Iran             | Nikfar, 2011<br>[5]            | Health system | Patients required<br>antidotes                          | Nationwide                                            | 2004-<br>2008                           | N/A<br>(national<br>data) | R               | PB                | IRR (NR)                      | Bottom-up                           |                                          | Database,<br>Interview,<br>Literature | Listed<br>price                |
| Upper-<br>middle                    | Iran             | Mashhadi,<br>2017 [6]          | Societal      | Snakebite and<br>scorpion sting<br>patients             | Three<br>hospitals in<br>Ahvaz                        | January<br>to<br>Decembe<br>r 2015      | 655 patients              | CS              | IB                | I\$ (NR)                      | Bottom-up                           | Human-<br>capital                        | Chart,<br>Interview                   | Interview,<br>Listed<br>price  |
| <b>North America</b>                |                  |                                |               |                                                         |                                                       |                                         |                           |                 |                   |                               |                                     |                                          |                                       |                                |
| High                                | Canada           | Currán-Sills,<br>2018 [7]      | Provider      | Snakebite<br>patients                                   | Nationwide                                            | January<br>2008 to<br>April 2016        | 99 patients               | R               | PB                | USD<br>(2017)                 | Bottom-up                           |                                          | Chart                                 | Market<br>price                |
| High                                | United<br>States | Lopoo, 1998<br>[8]             | Provider      | Snakebite<br>children                                   | One referral<br>children<br>hospital in<br>Oklahoma   | 1987-<br>1997                           | 37 patients               | R               | PB                | USD (NR)                      | Bottom-up                           |                                          | Chart                                 | Listed<br>price                |
| High                                | United<br>States | Narra, 2014<br>[9]             | Societal      | Envenomed<br>children                                   | Thirty-three<br>tertiary<br>children's<br>hospitals   | 2009                                    | 2755 patient<br>s         | R               | PB                | USD (NR)                      | Bottom-up                           |                                          | Database                              | Listed<br>price                |
| High                                | United<br>States | Fowler, 2017<br>[10]           | Provider      | Crotaline<br>Snakebite<br>patients                      | One regional<br>hospital in<br>Texas                  | January<br>2010 to<br>Novembe<br>r 2014 | 146 patients              | R               | PB                | USD (NR)                      | Bottom-up                           |                                          | Database                              | Market<br>price                |

| Region/<br>Income<br>economies | Country      | Author, year            | Perspective   | Study<br>population        | Study setting                                   | Study<br>period               | Sample<br>size                  | Study<br>design | Study<br>approach | Currency<br>(Costing<br>year) | Direct cost<br>estimation<br>method | Indirect<br>cost<br>estimation<br>method | Source of<br>resource<br>utilization | Source<br>of price                 |
|--------------------------------|--------------|-------------------------|---------------|----------------------------|-------------------------------------------------|-------------------------------|---------------------------------|-----------------|-------------------|-------------------------------|-------------------------------------|------------------------------------------|--------------------------------------|------------------------------------|
| <b>South Asia</b>              |              |                         |               |                            |                                                 |                               |                                 |                 |                   |                               |                                     |                                          |                                      |                                    |
| Upper-middle                   | Sri Lanka    | Kasturiratne, 2017 [11] | Societal      | Snakebite victims          | All households in nine provinces                | August 2012 to June 2013      | 695 victims (44,136 households) | CS, M           | PB                | LKR, USD (NR)                 | Bottom-up                           | Human-capital                            | Database, Interview                  | Interview, Listed price            |
| Lower-middle                   | Bangladesh   | Hasan, 2012 [12]        | Patient       | Snakebite patients         | Four rural tertiary level hospitals             | June to October 2006          | 83 patients                     | P               | PB                | USD (NR)                      | Bottom-up                           | Human-capital                            | Interview                            | Market price, Interview, Interview |
| Lower-middle                   | India        | Vaiyapuri, 2013 [13]    | Patient       | Snakebite victims          | Thirty villages in rural Tami Nadu              | November to December 2010     | 1115 victims (7578 households)  | CS              | PB                | EUR, INR (NR)                 | Bottom-up                           | Human-capital                            | Interview                            | Interview                          |
| Lower-middle                   | India        | Gupt, 2015 [14]         | Provider      | Snakebite patients         | One hospital in Himachal Pradesh                | January 2008 to December 2012 | 497 patients                    | R               | PB                | INR, USD (NR)                 | Bottom-up                           |                                          | Chart                                | Listed price                       |
| Lower-middle                   | India        | Meena, 2016 [15]        | Health system | All patients               | One tertiary hospital in Southern Rajasthan     | 2014-2015                     | 200 patients                    | P               | PB                | INR (NR)                      | Bottom-up                           |                                          | Chart, Interview                     | Listed price                       |
| Lower-middle                   | India        | Ramanath, 2016 [16]     | Provider      | Snakebite patients         | One rural hospital                              | January 2011 to February 2015 | 190 patients                    | P, R            | PB                | INR (NR)                      | Bottom-up                           |                                          | Chart, Interview                     | Listed price                       |
| Lower-middle                   | Pakistan     | Qureshi, 2013 [17]      | Health system | Envenomed snakebite adults | Two public-sector hospitals                     | June to September 2010        | 74 patients                     | P               | PB                | PKR (NR)                      | Bottom-up                           |                                          | Chart                                | Listed price                       |
| Low                            | Nepal        | Sharma, 2004 [18]       | Patient       | Snakebite victims          | Community-based; Five villages in eastern Terai | December 2001                 | 143 victims (1817 households)   | CS              | PB                | USD (NR)                      | Bottom-up                           | Human-capital                            | Interview                            | Interview                          |
| <b>Sub-Saharan Africa</b>      |              |                         |               |                            |                                                 |                               |                                 |                 |                   |                               |                                     |                                          |                                      |                                    |
| Upper-middle                   | South Africa | Darryl, 2016 [19]       | Health system | Snakebite patients         | Fifty-six public hospitals in KwaZulu Natal     | 2012-2013                     | 56 hospitals                    | M, R            | PB                | USD (NR)                      | Bottom-up                           |                                          | Chart, Database                      | Listed price, Literature           |
| Lower-middle                   | Nigeria      | Michael, 2011 [20]      | Societal      | Snakebite patients         | One 22-bed rural hospital in central Nigeria    | April to July 2006            | 72 patients                     | P               | PB                | NGN, USD (NR)                 | Bottom-up                           |                                          | Chart, Interview                     | Listed price                       |
| Lower-middle                   | Zimbabwe     | Kasilo, 1993 [21]       | Provider      | Snakebite patients         | Six urban major referral hospitals              | 1980-1989                     | 995 patients                    | R               | PB                | USD, ZWD (NR)                 | Bottom-up                           |                                          | Chart                                | Listed price                       |

| Region/<br>Income<br>economies | Country         | Author, year            | Perspective | Study<br>population                                 | Study setting                      | Study<br>period                         | Sample<br>size            | Study<br>design | Study<br>approach | Currency<br>(Costing<br>year) | Direct cost<br>estimation<br>method | Indirect<br>cost<br>estimation<br>method | Source of<br>resource<br>utilization | Source<br>of price |
|--------------------------------|-----------------|-------------------------|-------------|-----------------------------------------------------|------------------------------------|-----------------------------------------|---------------------------|-----------------|-------------------|-------------------------------|-------------------------------------|------------------------------------------|--------------------------------------|--------------------|
| Lower-<br>middle               | Zimbabwe        | Tagwireyi,<br>2001 [22] | Provider    | Uncomplicated<br>envenomed<br>snakebite<br>patients | One large<br>teaching<br>hospital  | January<br>1996 to<br>Decembe<br>r 1999 | 78 patients               | R               | PB                | USD,<br>ZWD<br>(2000)         | Bottom-up                           |                                          | Chart                                | Market<br>price    |
| Low                            | Burkina<br>Faso | Gampini, 2016<br>[23]   | Patient     | Snakebite<br>patients                               | All public<br>health<br>facilities | 2010-<br>2014                           | N/A<br>(national<br>data) | R               | PB                | USD (NR)                      | Bottom-up                           |                                          | Database                             | Market<br>price    |

CS – Cross-sectional, EUR – Euro, I\$ - International Dollar, IB – Incidence-based, INR – Indian Rupee, IRR – Iranian Rial, LKR – Sri Lankan Rupee, M – Modelling, MMK – Myanmar Kyat, MXN – Mexican Peso, N/A – Not Applicable, NGN – Nigerian Naira, NR – Not reported, PB – Prevalence-based, PKR – Pakistani Rupee, R – Retrospective, USD – United States Dollar, ZWD – Zimbabwean Dollar

## Description of methodological characteristics of included cost of illness studies

### Perspective

Eight studies undertook analysis from the healthcare provider's perspective [4,7,8,10,14,16,21,22], and five studies utilized health system's perspective. [2,5,15,17,19] All of these studies only focused on direct medical costs such as antivenom costs, and hospitalization costs. Other five studies utilized patient's perspective [1,12,13,18,23] and the remaining five studies utilized societal perspective. [3,6,9,11,20] These studies incorporated broader scope of costs including both direct and indirect costs.

### Study population and setting

Most studies included population from all age groups. Only three studies focused on children [4,8,9], and one studies focused on adult.[17] Studies were categorized from study location as hospital-based and community-based study. Nineteen studies were hospital-based study as they focused only snakebite patients presented at hospitals.[2-10,12,14-17,19-23] While the remaining four studies focused on snakebite victims in the communities to also include those who did not reach treatment facilities.[1,11,13,18]

### Study design and study approach

Study design was classified as cross-sectional, modelling, prospective, and retrospective. Twelve studies collected data retrospectively using data in medical records or databases. [2-5,7-10,21-23] Cross-sectional studies were done in four studies.[1,6,13,18] Four studies prospectively collected data from snakebite patients. [12,15,17,20] One study collected data both retrospectively and prospectively.[16] The remaining two studies collected data which were further used in modelling costs of snakebite.[11,19]



Study approach for cost of illness study includes prevalence-based and incidence-based approach. Prevalent-based approach estimates cost of illness of all prevalent cases in the specific period of the study, usually one episode of snakebite. While, incidence-based estimates lifetime costs including costs related to disability or sequelae due to the diseases. Most studies undertook prevalence-based approach [1-5,7-23], except one study which estimated costs of productivity loss due to disease and to premature death using incidence-based approach.[6]

#### Costing year and reported currency

Year of cost estimation was reported only in two studies.[7,22] The costing years of the other 21 studies were not reported. Therefore, they were imputed using the publication year. [1-6,8-21,23] Cost estimates were reported in local currencies in nine studies [2,4,8-10,15-17], international currencies in six studies [3,6,7,12,18,19,23], and International Dollars (a hypothetical currency unit that is designed to capture differences in relative prices across different settings) in one study. [6] The other seven studies reported their results in both local and international currencies. [1,11,13,14,20-22]

#### Direct cost estimation method

Direct costs are commonly quantified using top-down or bottom-up approach. The top-down approach estimates direct costs by allocating aggregate costs at the national level according to the resources used by the disease cases. The bottom-up approach quantifies direct costs by calculating the resources used by the disease cases at the patient level. The costs per patient quantified using both approaches can be then extrapolated to national costs using relevant epidemiological data.[24] In this review, all of the included studies utilized bottom-up approach. [1-23]

#### Indirect cost estimation method

Indirect costs are costs of productivity losses due to premature death or consequences of the disease. Indirect costs are normally estimated by either human-capital or friction cost approach. Human-capital approach values the productivity losses as output lost due inability to fully perform productive activities. While, the friction cost approach values the productivity losses as the employment costs to replace the ill workers.[24] Only five of the included cost of illness studies estimated indirect costs due to snakebite, all of which utilized human-capital approach.[6,11-13,18] Therefore, only these studies could be considered as economic burden study because they estimated both direct and indirect costs

#### Sources of healthcare resource utilization

Sources of healthcare resource utilization are defined as Chart, Database, Interview, and Literature. Chart includes patient medical records. Database includes electronic medical records, claim databases, and national registries. Interview is conducted using questionnaire. Literature includes articles in published or unpublished sources and government documents. Studies might use more than one source of information. Chart was the most used source of healthcare resource utilization (n=12) [4,6-8,14-17,19-22], followed by interview (n=10) [1,5,6,11-13,15,16,18,20], database (n=7) [2,3,5,9,10,19,23], and literature (n=1).[5]

### Sources of price of healthcare resource

Sources of price of healthcare resource are defined as Interview, Listed price, Literature, and Market price. Interview includes prices or costs of illness revealed by interview especially out of pocket costs paid by patients and families. Listed price includes prices set in the hospital and financial or accounting databases. Literature includes standard cost database and published articles. Market price includes retail and wholesale prices. Studies might use more than one source of information. Listed price was assumed to be used when studies utilized hospital records to quantify resource utilization but not clearly stated the price source. Listed price was the most used source of price of healthcare resource (n=15) [2-6,8,9,11,14-17,19-21], followed by interview (n=6) [1,6,11-13,18], market price (n=5) [7,10,12,22,23], and literature (n=2).[3,19]

**Appendix S4 Methodological characteristics of the included economic evaluation studies associated with snakebites.**

| Author, year      | Country                  | Study Setting                                                        | Target population           | Type of snake                               | Type of antivenom            | Intervention                                                        | Comparator                              | Type of EE | Type of model           | Study perspective           | Health outcomes                                                                  | Time horizon | Discount rate    | Sensitivity analysis                    |
|-------------------|--------------------------|----------------------------------------------------------------------|-----------------------------|---------------------------------------------|------------------------------|---------------------------------------------------------------------|-----------------------------------------|------------|-------------------------|-----------------------------|----------------------------------------------------------------------------------|--------------|------------------|-----------------------------------------|
| Habib, 2015 [25]  | Nigeria                  | Public healthcare facilities in Nigeria                              | Envenomed snakebite victims | - Carpet viper<br>- non-carpet viper snakes | - Monovalent<br>- Polyvalent | Availability of geographically appropriate and effective antivenoms | No availability of effective antivenoms | CEA        | Decision analytic model | Public healthcare system    | - Full recovery<br>- Amputation<br>- Death                                       | Lifelong     | 3% only outcomes | - One-way<br>- Best-worst<br>- Scenario |
| Hamza, 2016 [26]  | 16 West Africa countries | Public healthcare facilities in West Africa                          | Envenomed snakebite victims | - Vipers<br>- non-viper snakes              | - Monovalent<br>- Polyvalent | Availability of effective antivenoms                                | No availability of effective antivenoms | CEA        | Decision analytic model | Public healthcare system    | - Full recovery<br>- Amputation<br>- Death                                       | Lifelong     | 3% only outcomes | - One-way<br>- PSA<br>- Scenario        |
| Herzel, 2018 [27] | India                    | Prehospital setting and Private health-care providers in South India | Snakebite victims           | Any snakes                                  | Not reported                 | Antivenom/adjunct combination strategy with supportive care         | Antivenom and supportive care           | CEA        | Decision analytic model | Private healthcare provider | - Full recovery<br>- Finger/Toe amputation<br>- Below-knee amputation<br>- Death | Lifelong     | 3% only outcomes | - One-way<br>- PSA<br>- Scenario        |

CEA – Cost-effectiveness analysis, PSA – Probabilistic sensitivity analysis

**Description of methodological characteristics of economic evaluation studies**

All three included economic evaluation studies are cost-effectiveness analysis utilized decision analytic models.[25-27] Two studies compared no access to antivenom to full access from the public healthcare system’s perspective. These studies only focused on envenomed snakebite patients presented to hospital. [25,26] While, another study compared antivenom alone with the antivenom adjunct combination strategy to improve the proportion of victims reaching healthcare facilities from the private healthcare system’s perspective. This study focused on snakebite victims outside of the hospital.[27] Antivenoms were part of the analysis in all three studies. The health outcomes of snakebite in the models were similar including full recovery, death, and amputation. Lifelong was selected as the time horizon to capture deaths and disabilities. However, discount was applied only to outcomes because direct costs of snakebite normally occurred during treatment in healthcare facilities. All three studies performed sensitivity analyses.[25-27]



| Region/<br>Income<br>economies                 | Country      | Author, year         | Direct medical costs |                 |                     |                      |                |                                |                 |                      |                         |                          |                         | Direct non-medical costs |                    |           |                    |                | Indirect costs            |                                |                                      |                    |
|------------------------------------------------|--------------|----------------------|----------------------|-----------------|---------------------|----------------------|----------------|--------------------------------|-----------------|----------------------|-------------------------|--------------------------|-------------------------|--------------------------|--------------------|-----------|--------------------|----------------|---------------------------|--------------------------------|--------------------------------------|--------------------|
|                                                |              |                      | Antivenom cost       | Antibiotic cost | Other medicine cost | Hospitalization cost | Diagnosis cost | Health worker and service cost | Laboratory cost | Medical product cost | Traditional healer cost | Forfeited antivenom cost | Medical evacuation cost | Transportation cost      | Communication cost | Food cost | Accommodation cost | Caregiver cost | Cost of productivity loss | Income lost in employed victim | Income loss in self-employed victims | Family income loss |
| Lower-middle                                   | India        | Ramanath, 2016 [16]  | +                    | +               | +                   | -                    | -              | -                              | -               | -                    | -                       | -                        | -                       | -                        | +                  | -         | -                  | -              | -                         | -                              | -                                    | -                  |
| Lower-middle                                   | Pakistan     | Qureshi, 2013 [17]   | +                    | -               | -                   | -                    | -              | -                              | -               | -                    | -                       | -                        | -                       | -                        | -                  | -         | -                  | -              | -                         | -                              | -                                    | -                  |
| Low                                            | Nepal        | Sharma, 2004 [18]    | +                    | +               | +                   | +                    | -              | +                              | -               | -                    | +                       | -                        | -                       | +                        | -                  | -         | -                  | -              | -                         | +                              | -                                    | -                  |
| <b>Sub-Saharan Africa</b>                      |              |                      |                      |                 |                     |                      |                |                                |                 |                      |                         |                          |                         |                          |                    |           |                    |                |                           |                                |                                      |                    |
| Upper-middle                                   | South Africa | Darryl, 2016 [19]    | +                    | -               | -                   | +                    | -              | -                              | -               | -                    | -                       | -                        | -                       | -                        | -                  | -         | -                  | -              | -                         | -                              | -                                    | -                  |
| Lower-middle                                   | Nigeria      | Michael, 2011 [20]   | +                    | -               | -                   | +                    | -              | -                              | -               | -                    | -                       | -                        | -                       | -                        | -                  | -         | -                  | -              | -                         | -                              | -                                    | -                  |
| Lower-middle                                   | Zimbabwe     | Kasilo, 1993 [21]    | +                    | -               | -                   | +                    | -              | -                              | -               | -                    | -                       | -                        | -                       | -                        | -                  | -         | -                  | -              | -                         | -                              | -                                    | -                  |
| Lower-middle                                   | Zimbabwe     | Tagwireyi, 2001 [22] | +                    | +               | -                   | -                    | -              | -                              | -               | -                    | -                       | -                        | -                       | -                        | -                  | -         | -                  | -              | -                         | -                              | -                                    | -                  |
| Low                                            | Burkina Faso | Gampini, 2016 [23]   | +                    | -               | -                   | -                    | -              | -                              | -               | -                    | -                       | -                        | -                       | -                        | -                  | -         | -                  | -              | -                         | -                              | -                                    | -                  |
| <b>No. of studies reporting cost component</b> |              |                      | 23                   | 8               | 7                   | 10                   | 2              | 3                              | 3               | 3                    | 3                       | 1                        | 1                       | 5                        | 3                  | 4         | 3                  | 2              | 1                         | 3                              | 1                                    | 2                  |
| <b>Percentage (%)</b>                          |              |                      | 100                  | 34.7<br>8       | 30.4<br>3           | 43.4<br>8            | 8.7<br>0       | 13.0<br>4                      | 13.0<br>4       | 13.0<br>4            | 13.0<br>4               | 4.3<br>5                 | 4.3<br>5                | 21.7<br>4                | 13.0<br>4          | 17.3<br>9 | 13.0<br>04         | 8.7<br>0       | 4.3<br>5                  | 13.04                          | 4.3<br>5                             | 8.7<br>0           |

## Description of reported cost components of snakebite

### Direct medical costs

Direct medical costs were estimated in all studies. Medicine costs for the treatment of snakebite were commonly reported. Anti-snake venom costs were estimated in all studies, antibiotic costs in eight studies (34.78%) [4,6,9,12,13,16,18,22], and other medicine costs such as analgesics in seven studies (30.43%). [3,6,11-13,16,18] Hospitalization costs were also reported in ten studies (43.48%). [2,4,6,8,9,11,18-21] The other cost components were varied by studies. For example, traditional healer costs were reported in three studies (13.04%). [1,11,18]

### Direct non-medical costs

Six studies estimated direct non-medical costs [3,5,11,12,16,18]. Components of direct non-medical cost reported in the included studies were costs of transportation, communication, food, accommodation, and caregivers. Transportation and food costs were the most commonly reported components among the six studies.

### Indirect costs

Five studies estimated indirect costs. [6,11-13,18] Components of indirect costs reported in the included studies were costs of productivity loss due to premature death and disability, income loss, and family income loss. Income loss in employed snakebite victims were the most commonly reported components among the five studies.

**Appendix S6** Quality assessment of the included cost of illness studies associated with snakebites.

| Author, year            | Specified perspective | Specified Epidemiologic approach | Specified study question | Specified Resource quantification method | Specified Healthcare resource valuation | Specified Productivity loss valuation | Estimated Intangible cost | Description of statistical analyses | Performed sensitivity analysis | Reporting of detailed cost components |
|-------------------------|-----------------------|----------------------------------|--------------------------|------------------------------------------|-----------------------------------------|---------------------------------------|---------------------------|-------------------------------------|--------------------------------|---------------------------------------|
| Kasilo, 1993 [21]       | NO                    | NO                               | NO                       | YES                                      | NO                                      | NO                                    | NO                        | YES                                 | NO                             | NO                                    |
| Lopoo, 1998 [8]         | NO                    | NO                               | NO                       | YES                                      | NO                                      | NO                                    | NO                        | YES                                 | NO                             | NO                                    |
| Tagwireyi, 2001 [22]    | NO                    | NO                               | YES                      | YES                                      | YES                                     | NO                                    | NO                        | YES                                 | NO                             | YES                                   |
| Sharma, 2004 [18]       | NO                    | NO                               | YES                      | YES                                      | YES                                     | YES                                   | NO                        | YES                                 | NO                             | YES                                   |
| Sotelo, 2007 [4]        | NO                    | NO                               | YES                      | YES                                      | YES                                     | NO                                    | NO                        | YES                                 | NO                             | NO                                    |
| Michael, 2011 [20]      | NO                    | NO                               | YES                      | YES                                      | NO                                      | NO                                    | NO                        | YES                                 | NO                             | NO                                    |
| Nikfar, 2011 [5]        | NO                    | NO                               | NO                       | YES                                      | YES                                     | NO                                    | NO                        | YES                                 | NO                             | YES                                   |
| Hasan, 2012 [12]        | NO                    | NO                               | YES                      | YES                                      | YES                                     | YES                                   | NO                        | YES                                 | NO                             | YES                                   |
| Saz-Parkinson, 2012 [2] | NO                    | NO                               | YES                      | YES                                      | NO                                      | NO                                    | NO                        | YES                                 | NO                             | NO                                    |
| Qureshi, 2012 [17]      | NO                    | NO                               | YES                      | YES                                      | NO                                      | NO                                    | NO                        | NO                                  | NO                             | NO                                    |
| Vaiyapuri, 2013 [13]    | NO                    | NO                               | YES                      | YES                                      | YES                                     | NO                                    | NO                        | YES                                 | NO                             | NO                                    |
| Narra, 2014 [9]         | NO                    | NO                               | YES                      | YES                                      | YES                                     | NO                                    | NO                        | YES                                 | NO                             | NO                                    |
| Gupt, 2015 [14]         | NO                    | NO                               | NO                       | YES                                      | NO                                      | NO                                    | NO                        | YES                                 | NO                             | NO                                    |
| Darryl, 2016 [19]       | NO                    | NO                               | YES                      | YES                                      | YES                                     | NO                                    | NO                        | YES                                 | NO                             | YES                                   |
| Gampini, 2016 [23]      | NO                    | NO                               | YES                      | YES                                      | YES                                     | NO                                    | NO                        | YES                                 | NO                             | NO                                    |
| Meena, 2016 [15]        | NO                    | NO                               | NO                       | YES                                      | NO                                      | NO                                    | NO                        | YES                                 | NO                             | NO                                    |
| Ramanath, 2016 [16]     | NO                    | NO                               | NO                       | YES                                      | YES                                     | NO                                    | NO                        | YES                                 | NO                             | NO                                    |
| Bachan, 2017 [3]        | NO                    | NO                               | YES                      | YES                                      | NO                                      | NO                                    | NO                        | NO                                  | NO                             | YES                                   |

| Author, year                     | Specified perspective | Specified Epidemiologic approach | Specified study question | Specified Resource quantification method | Specified Healthcare resource valuation | Specified Productivity loss valuation | Estimated Intangible cost | Description of statistical analyses | Performed sensitivity analysis | Reporting of detailed cost components |
|----------------------------------|-----------------------|----------------------------------|--------------------------|------------------------------------------|-----------------------------------------|---------------------------------------|---------------------------|-------------------------------------|--------------------------------|---------------------------------------|
| Fowler, 2017 [10]                | NO                    | NO                               | YES                      | YES                                      | YES                                     | NO                                    | NO                        | YES                                 | NO                             | NO                                    |
| Kasturiratne, 2017 [11]          | NO                    | NO                               | YES                      | YES                                      | YES                                     | YES                                   | NO                        | YES                                 | NO                             | YES                                   |
| Mashhadi, 2017 [6]               | YES                   | YES                              | YES                      | YES                                      | YES                                     | YES                                   | NO                        | YES                                 | NO                             | YES                                   |
| Curran-Sills, 2018 [7]           | NO                    | NO                               | YES                      | YES                                      | YES                                     | NO                                    | NO                        | YES                                 | NO                             | NO                                    |
| Schioldann, 2018 [1]             | NO                    | NO                               | NO                       | NO                                       | NO                                      | NO                                    | NO                        | NO                                  | NO                             | NO                                    |
| Kasilo, 1993 [21]                | NO                    | NO                               | NO                       | YES                                      | NO                                      | NO                                    | NO                        | YES                                 | NO                             | NO                                    |
| <b>No. of fulfilling studies</b> | <b>1</b>              | <b>1</b>                         | <b>16</b>                | <b>22</b>                                | <b>14</b>                               | <b>4</b>                              | <b>0</b>                  | <b>20</b>                           | <b>0</b>                       | <b>8</b>                              |
| <b>Percentage</b>                | <b>4.35%</b>          | <b>4.35%</b>                     | <b>69.57%</b>            | <b>95.65%</b>                            | <b>60.87%</b>                           | <b>17.39%</b>                         | <b>0.00%</b>              | <b>86.96%</b>                       | <b>0.00%</b>                   | <b>34.78%</b>                         |



**Appendix S7** Quality assessment of included economic evaluation studies associated with snakebites.

| Recommended aspects                        | Author, year     |                  |                   | No. of fulfilling studies | Percentage (%) |
|--------------------------------------------|------------------|------------------|-------------------|---------------------------|----------------|
|                                            | Habib, 2015 [25] | Hazam, 2016 [26] | Herzel, 2018 [27] |                           |                |
| Study question                             | YES              | YES              | YES               | 3                         | 100.00         |
| Description of intervention and comparator | YES              | YES              | NO                | 2                         | 66.67          |
| Measurement of effectiveness               | YES              | YES              | NO                | 2                         | 66.67          |
| Assumption of costs and outcomes           | YES              | YES              | YES               | 3                         | 100.00         |
| Currency and price data                    | YES              | NO               | YES               | 2                         | 66.67          |
| Choice of model                            | YES              | YES              | YES               | 3                         | 100.00         |
| Perspective                                | YES              | YES              | YES               | 3                         | 100.00         |
| Time horizon                               | YES              | YES              | YES               | 3                         | 100.00         |
| Discount rate                              | YES              | YES              | YES               | 3                         | 100.00         |
| Calculated and reported ICER               | YES              | YES              | YES               | 3                         | 100.00         |
| Sensitivity analysis                       | YES              | YES              | YES               | 3                         | 100.00         |
| Disclosed funding source                   | YES              | YES              | YES               | 3                         | 100.00         |

**Appendix S8** Cost estimates per episode of snakebite in US\$ 2018.

| Region/ Income economies               | Country       | Author, year            | Perspective   | Average cost per episode of snakebite (US\$ 2018) |                          |                 |             |
|----------------------------------------|---------------|-------------------------|---------------|---------------------------------------------------|--------------------------|-----------------|-------------|
|                                        |               |                         |               | Direct medical costs                              | Direct non-medical costs | Indirect costs  | Total costs |
| <b>East Asia and Pacific</b>           |               |                         |               |                                                   |                          |                 |             |
| Lower-middle                           | Myanmar       | Schioldann, 2018 [1]    | Patient       | 230.80                                            |                          | NR              | 230.80      |
| <b>Latin America and the Caribbean</b> |               |                         |               |                                                   |                          |                 |             |
| High                                   | Spain         | Saz-Parkinson, 2012 [2] | Health system | 2339.40                                           | NR                       | NR              | 2339.40     |
| <b>Middle East and North Africa</b>    |               |                         |               |                                                   |                          |                 |             |
| Upper-middle                           | Guyana        | Bachan, 2017 [3]        | Societal      | 1090.20                                           | 1170.91                  | NR              | 2261.11     |
| Upper-middle                           | Mexico        | Sotelo, 2008 [4]        | Provider      | 962.34                                            | NR                       | NR              | 962.34      |
| Upper-middle                           | Iran          | Nikfar, 2011 [5]        | Health system | NR                                                | NR                       | NR              | NR          |
| Upper-middle                           | Iran          | Mashhadi, 2017 [6]      | Societal      | 494.23                                            | 546.04                   | 180.63          | 1220.90     |
| <b>North America</b>                   |               |                         |               |                                                   |                          |                 |             |
| High                                   | Canada        | Curran-Sills, 2018 [7]  | Provider      | 25553.86                                          | NR                       | NR              | 25553.86    |
| High                                   | United States | Lopoo, 1998 [8]         | Provider      | 3592.27                                           | NR                       | NR              | 3592.27     |
| High                                   | United States | Narra, 2014 [9]         | Societal      | 1296.74                                           | NR                       | NR              | 1296.74     |
| High                                   | United States | Fowler, 2017 [10]       | Provider      | 40493.10                                          | NR                       | NR              | 40493.10    |
| <b>South Asia</b>                      |               |                         |               |                                                   |                          |                 |             |
| Upper-middle                           | Sri Lanka     | Kasturiratne, 2017 [11] | Societal      | 123.60                                            | 19.32                    | 26.20           | 169.12      |
| Lower-middle                           | Bangladesh    | Hasan, 2012 [12]        | Societal      | 106.59                                            | 66.89                    | 19.68           | 193.16      |
| Lower-middle                           | India         | Vaiyapuri, 2013 [13]    | Patient       | 0.00 - 6034.10                                    |                          | 34.48 - 1724.03 | NR          |
| Lower-middle                           | India         | Gupt, 2015 [14]         | Provider      | 80.91                                             | NR                       | NR              | 80.91       |
| Lower-middle                           | India         | Meena, 2016 [15]        | Health system | 176.37                                            | NR                       | NR              | 176.37      |
| Lower-middle                           | India         | Ramanath, 2016 [16]     | Provider      | 522.47                                            | NR                       | NR              | 522.47      |
| Lower-middle                           | Pakistan      | Qureshi, 2013 [17]      | Health system | 78.85                                             | NR                       | NR              | 78.85       |
| Low                                    | Nepal         | Sharma, 2004 [18]       | Patient       | 68.98                                             | 11.76                    | 41.30           | 122.02      |
| <b>Sub-Saharan Africa</b>              |               |                         |               |                                                   |                          |                 |             |
| Upper-middle                           | South Africa  | Darryl, 2016 [19]       | Health system | 1295.63                                           | NR                       | NR              | 1295.63     |
| Lower-middle                           | Nigeria       | Michael, 2011 [20]      | Societal      | 8.44                                              | NR                       | NR              | 8.44        |
| Lower-middle                           | Zimbabwe      | Kasilo, 1993 [21]       | Provider      | 4.32                                              | NR                       | NR              | 4.32        |
| Lower-middle                           | Zimbabwe      | Tagwireyi, 2001 [22]    | Provider      | 4.33                                              | NR                       | NR              | 4.33        |
| Low                                    | Burkina Faso  | Gampini, 2016 [23]      | Patients      | NR                                                | NR                       | NR              | NR          |

NR – Not reported

**Appendix S9 Summary of findings of included economic evaluation studies associated with snakebites.**

| Author, year      | Country                  | Sequela (rate)                                             | Currency, year | Antivenom price/dose (US\$ 2018) | Antivenom price/course (US\$ 2018) | Disability weight                                             | Reported outcome | GDP per capita (US\$ 2018) | Threshold used   | ICER (US\$ 2018)                                                                             | Study conclusion    | Most sensitive parameters                                                                                                                             |
|-------------------|--------------------------|------------------------------------------------------------|----------------|----------------------------------|------------------------------------|---------------------------------------------------------------|------------------|----------------------------|------------------|----------------------------------------------------------------------------------------------|---------------------|-------------------------------------------------------------------------------------------------------------------------------------------------------|
| Habib, 2015 [25]  | Nigeria                  | - Amputation (3%)<br>- Blindness (0.01%)*<br>- PTSD (20%)* | US\$, 2015     | US\$87.68                        | US\$87.68                          | - Amputation 0.102<br>- Blindness 0.552*<br>- PTSD 0.105*     | DALYs, Deaths    | US\$1090.70                | 1 GDP per capita | - US\$1634.40 per Death averted<br>- US\$69.87 per DALY averted                              | Very cost-effective | - Costs of antivenom<br>- Proportion of envenoming due to carpet viper,<br>- Probability of dying following carpet viper envenoming                   |
| Hamza, 2016 [26]  | 16 West Africa countries | - Amputation (3%)<br>- Blindness (0.01%)*<br>- PTSD (20%)* | US\$, 2015     | US\$139.73                       | US\$139.73                         | - Amputation 0.102<br>- Blindness 0.552*<br>- PTSD 0.105*     | DALYs, Deaths    | US\$351.60 to US\$2504.14  | 1 GDP per capita | - US\$1823.77 to US\$5666.75 per Death averted<br>- US\$75.80 to US\$256.62 per DALY averted | Very cost-effective | - Costs of antivenom<br>- Antivenom effectiveness against non-carpet viper envenoming<br>- Probability of dying following non-carpet viper envenoming |
| Herzel, 2018 [27] | India                    | - Amputation (25%)                                         | US\$, 2015     | US\$10.01                        | US\$300.44                         | - Below-knee amputation 0.164<br>- Finger/toe amputation 0.02 | DALYs            | US\$1569.72                | 1 GDP per capita | - US\$71.16 per DALYs averted                                                                | Very cost-effective | - Proportion of severe envenomation<br>- Cost of severe envenomation<br>- Proportion of patients reaching treatment facilities                        |

\* - included in model in sensitivity analysis, DALYs – Disability-Adjusted Life Years, GDP – Gross Domestic Product, ICER – Incremental Cost-Effectiveness Ratio, PTSD – Post-Traumatic Stress Disorder

## REFERENCES

- 1 Schioldann E, Mahmood MA, Kyaw MM, Halliday D, Thwin KT, Chit NN, et al. Why snakebite patients in Myanmar seek traditional healers despite availability of biomedical care at hospitals? Community perspectives on reasons. *PLoS neglected tropical diseases*. 2018;12:e0006299.
- 2 Saz-Parkinson Z, del Pino Luengo M, Lopez-Cuadrado T, Andujar D, Carmona-Alferez R, Flores RM, et al. Approach to the epidemiology of venomous bites in Spain. *Toxicon : official journal of the International Society on Toxinology*. 2012;60:706-11.
- 3 Bachan V, Tatkan G, Adu-Krow W. Transportation (medical evacuations) of snake bitten persons from the Hinterland Regions in Guyana: Cost analysis. *West Indian Medical Journal*. 2017;66:43.
- 4 Sotelo N. Review of treatment and complications in 79 children with rattlesnake bite. *Clinical pediatrics*. 2008;47:483-9.
- 5 Nikfar S, Khatibi M, Abdollahi-Asl A, Abdollahi M. Cost and utilization study of antidotes: An Iranian experience. *International Journal of Pharmacology*. 2011;7:46-9.
- 6 Mashhadi I, Kavousi Z, Peymani P, Salman Zadeh Ramhormozi S, Keshavarz K. Economic burden of scorpion sting and snake bite from a social perspective in Iran. *Shiraz E Medical Journal*. 2017;18.
- 7 Curran-Sills G, Kroeker J. Venomous Snakebites in Canada: A National Review of Patient Epidemiology and Antivenom Usage. *Wilderness & environmental medicine*. 2018;29:437-45.
- 8 Lopoo JB, Bealer JF, Mantor PC, Tuggle DW. Treating the snakebitten child in North America: a study of pit viper bites. *Journal of pediatric surgery*. 1998;33:1593-5.
- 9 Narra A, Lie E, Hall M, Macy M, Alpern E, Shah SS, et al. Resource utilization of pediatric patients exposed to venom. *Hospital pediatrics*. 2014;4:276-82.
- 10 Fowler AL, Hughes DW, Muir MT, VanWert EM, Gamboa CD, Myers JG. Resource Utilization After Snakebite Severity Score Implementation into Treatment Algorithm of Crotaline Bite. *The Journal of emergency medicine*. 2017;53:854-61.
- 11 Kasturiratne A, Pathmeswaran A, Wickremasinghe AR, Jayamanne SF, Dawson A, Isbister GK, et al. The socio-economic burden of snakebite in Sri Lanka. *PLoS neglected tropical diseases*. 2017;11:e0005647.
- 12 Hasan SM, Basher A, Molla AA, Sultana NK, Faiz MA. The impact of snake bite on household economy in Bangladesh. *Tropical doctor*. 2012;42:41-3.
- 13 Vaiyapuri S, Vaiyapuri R, Ashokan R, Ramasamy K, Nattamaisundar K, Jeyaraj A, et al. Snakebite and its socio-economic impact on the rural population of Tamil Nadu, India. *PLoS one*. 2013;8:e80090.
- 14 Gupt A, Bhatnagar T, Murthy BN. Epidemiological profile and management of snakebite cases - A cross sectional study from Himachal Pradesh, India. *Clinical Epidemiology and Global Health*. 2015;3:S96-S100.
- 15 Meena VK, Atray M, Agrawal A. Evaluation of drug utilization pattern in indoor patients of medicine department at tertiary care teaching hospital in southern Rajasthan. *International Journal of Pharmaceutical Sciences and Research*. 2016;7:3835-40.
- 16 Ramanath KV, Anitha C, Junied S. Study on snake bite poisoning and it's outcomes in a Rural Tertiary Care Hospital. *Research Journal of Pharmaceutical, Biological and Chemical Sciences*. 2016;7:1875-89.
- 17 Qureshi H, Alam SE, Mustufa MA, Nomani NK, Asnani JL, Sharif M. Comparative cost and efficacy trial of Pakistani versus Indian anti snake venom. *JPMA The Journal of the Pakistan Medical Association*. 2013;63:1129-32.
- 18 Sharma SK, Chappuis F, Jha N, Bovier PA, Loutan L, Koirala S. Impact of snake bites and determinants of fatal outcomes in Southeastern Nepal. *American Journal of Tropical Medicine and Hygiene*. 2004;71:234-8.

- 19 Darryl W, Sartorius B, Hift R. Estimating the Burden of Snakebite on Public Hospitals in KwaZulu Natal, South Africa. *Wilderness & environmental medicine*. 2016;27:53-61.
- 20 Michael GC, Thacher TD, Shehu MI. The effect of pre-hospital care for venomous snake bite on outcome in Nigeria. *Transactions of the Royal Society of Tropical Medicine and Hygiene*. 2011;105:95-101.
- 21 Kasilo OM, Nhachi CF. A retrospective study of poisoning due to snake venom in Zimbabwe. *Human & experimental toxicology*. 1993;12:15-8.
- 22 Tagwireyi DD, Ball DE, Nhachi CF. Routine prophylactic antibiotic use in the management of snakebite. *BMC clinical pharmacology*. 2001;1:4.
- 23 Gampini S, Nassouri S, Chippaux JP, Semde R. Retrospective study on the incidence of envenomation and accessibility to antivenom in Burkina Faso. *The journal of venomous animals and toxins including tropical diseases*. 2016;22:10.
- 24 Larg A, Moss JR. Cost-of-illness studies: a guide to critical evaluation. *Pharmacoeconomics*. 2011;29:653-71.
- 25 Habib AG, Lamorde M, Dalhat MM, Habib ZG, Kuznik A. Cost-effectiveness of antivenoms for snakebite envenoming in Nigeria. *PLoS neglected tropical diseases*. 2015;9:e3381.
- 26 Hamza M, Idris MA, Maiyaki MB, Lamorde M, Chippaux JP, Warrell DA, et al. Cost-Effectiveness of Antivenoms for Snakebite Envenoming in 16 Countries in West Africa. *PLoS neglected tropical diseases*. 2016;10:e0004568.
- 27 Herzel BJ, Samuel SP, Bulfone TC, Raj CS, Lewin M, Kahn JG. Snakebite: An Exploratory Cost-Effectiveness Analysis of Adjunct Treatment Strategies. *The American journal of tropical medicine and hygiene*. 2018;99:404-12.
